# Supplementary material for: Taxon‐rich phylogeny and taxonomy of the genus Phacus (Euglenida) based on morphological and molecular data
Source: PubMed Central journal article supplement (PMC7687149; doi:10.1111/jpy.13028), 2020-06-26

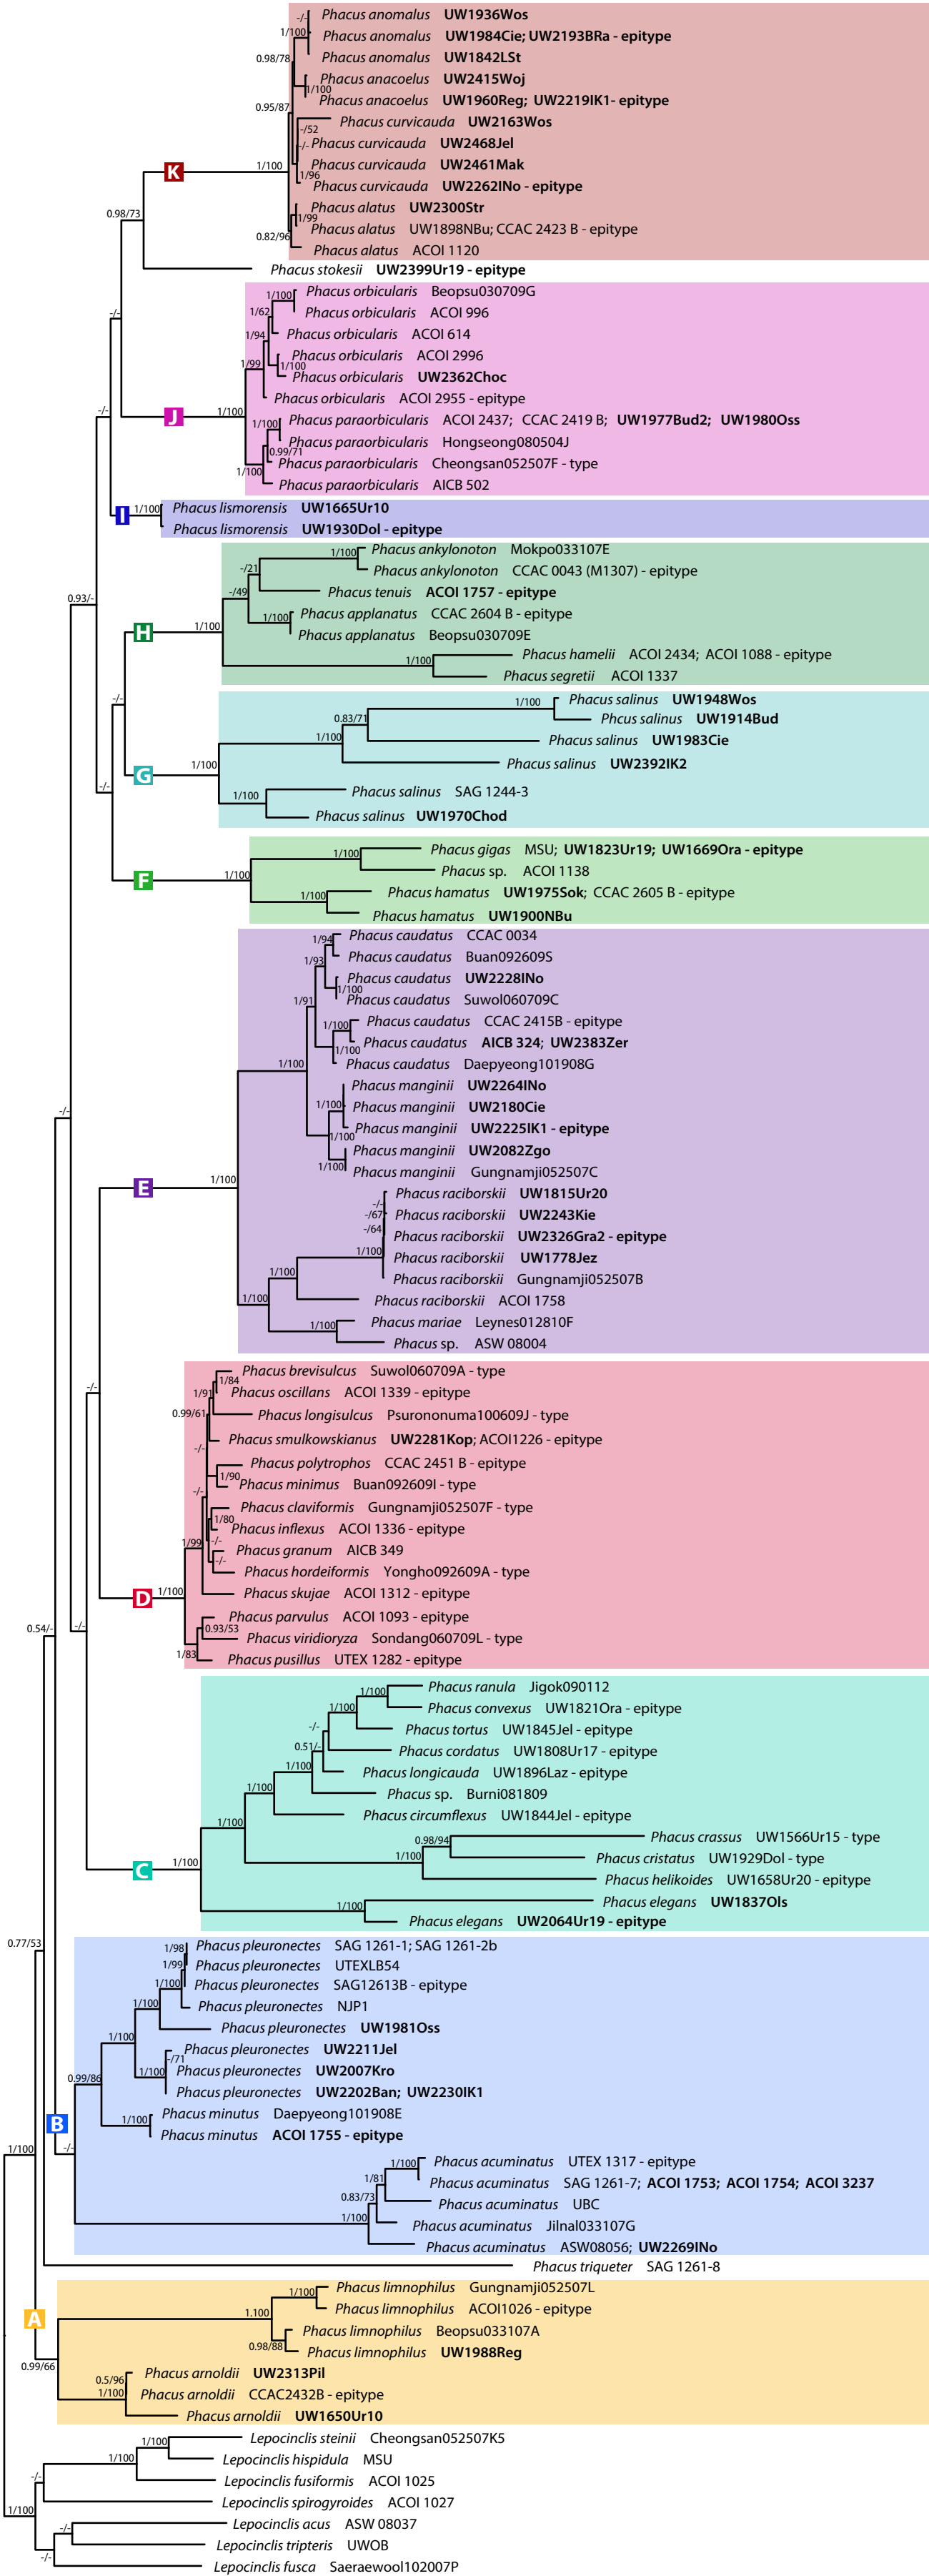

Supplement: JPY-56-1135-s001.pdf [file JPY-56-1135-s001.pdf]
